# Supplementary material for: A phosphorylation signal activates genome-wide transcriptional control by BfmR, the global regulator of Acinetobacter resistance and virulence
Source: PubMed Central journal article supplement — bioRxiv. 2024 Jul 1:2024.06.16.599214. Originally published 2024 Jun 17. Preprint. [Version 2] doi: 10.1101/2024.06.16.599214 (PMC11212878; doi:10.1101/2024.06.16.599214), 2024-07-01
Supplement: media-1.pdf [file media-1.pdf]

**A**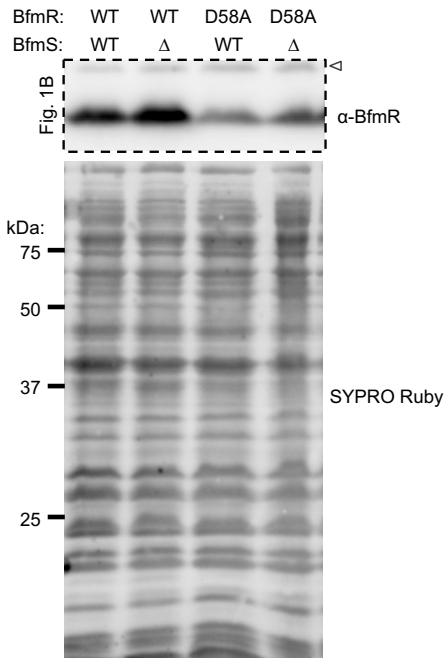**B**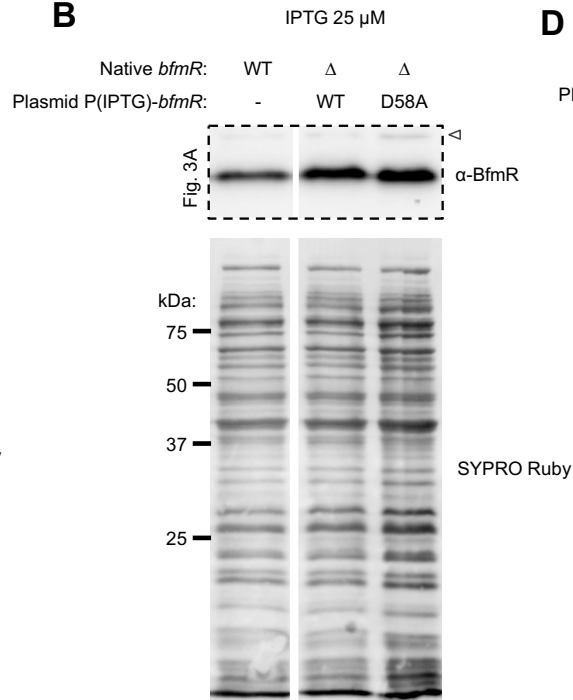**D**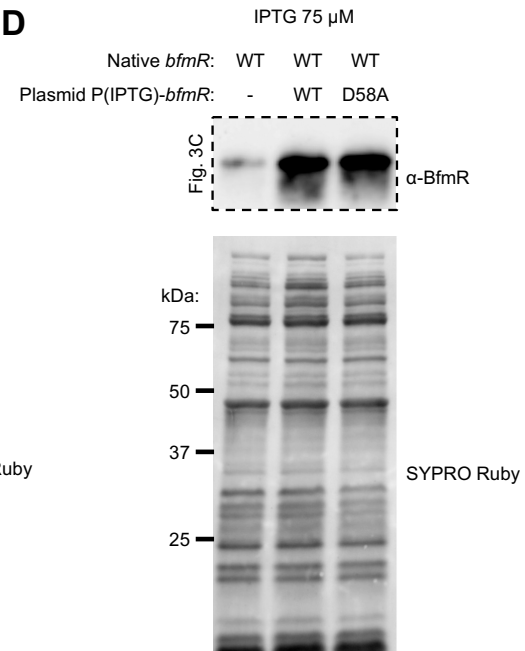**C**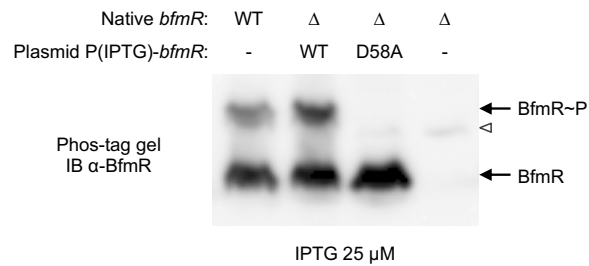

**Fig. S1. Supplemental information from Western blots.** (A, B and D) SYPRO staining of total protein in the blotted samples from Fig. 1B, 3A, and 3C, respectively. kDa values indicate the migration of molecular weight markers. (C) Phos-tag immunoblot of samples from Fig. 3A. Open arrowheads indicate non-specific protein band reacting weakly with BfmR antiserum.

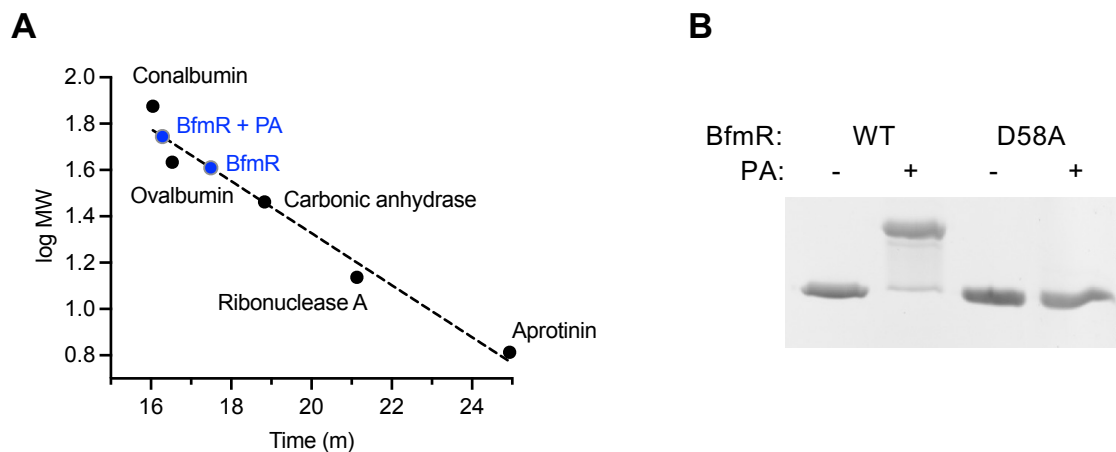

**Fig. S2. Analyses of BfmR *in vitro*.** (A) Estimation of BfmR molecular weight relative to protein standards without and with phosphorylation (Buffer S). Retention times of the protein standards (Gel Filtration LMW Calibration Kit, Cytiva) was plotted vs molecular weight. Estimated size of BfmR and BfmR+PA was determined by plotting their average peak retention time (n=3). (B) Efficient phosphorylation of purified BfmR protein used in MST experiments. BfmR was treated with or without PA in Buffer D, and phosphorylation analyzed by Phos-tag gel as in Fig. 4.

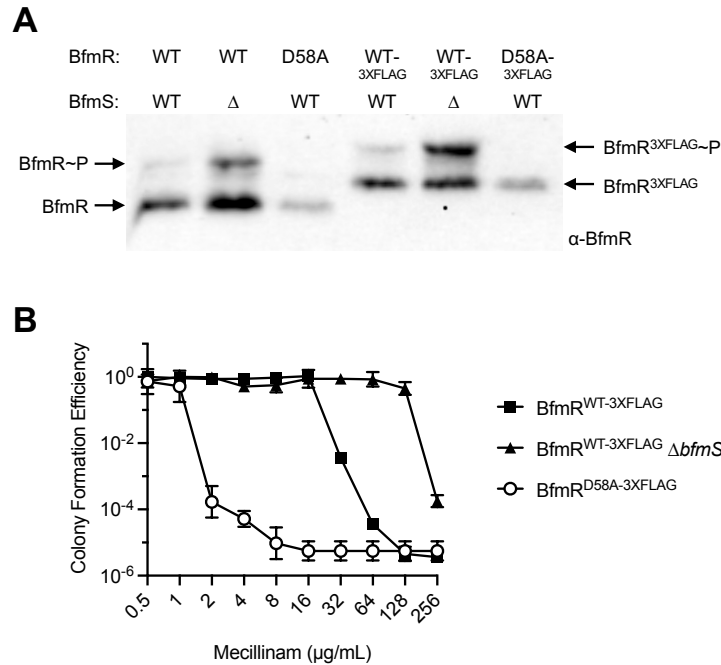

**Fig. S3. C-terminal 3XFLAG epitope tag preserves BfmR functions.** (A) Phos-tag Western blot analysis of BfmR phosphorylation in strains with the indicated *bfmRS* alleles. Blots were probed with BfmR antiserum. (B) Strains containing a C-terminal 3XFLAG tag on BfmR show levels of resistance to mecillinam resistance consistent with that seen with untagged strains [4]. Colony forming efficiency was measured on solid medium with mecillinam at the indicated dose compared to control medium lacking drug. Data points show geometric mean  $\pm$  s.d. (n=3).

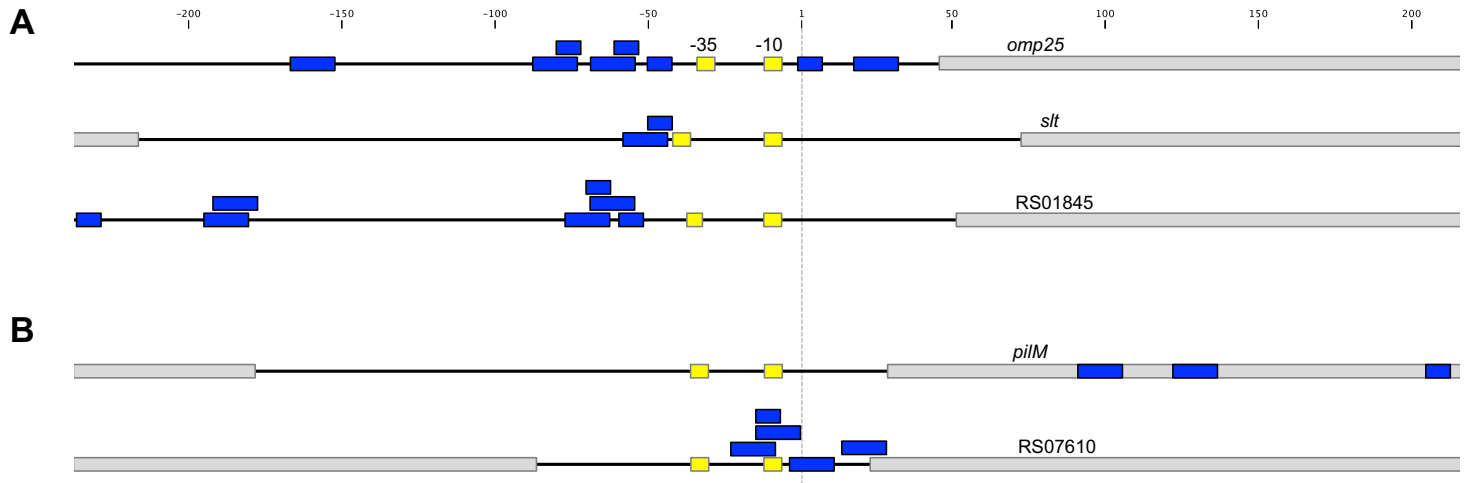

**Fig. S4. Locations of BfmR binding motifs relative to promoters of example direct target genes.** Promoter regions of activated (A) and repressed (B) targets are shown. Location of promoter elements was determined from [10] (*slt*, RS01845), [11] (*omp25*), or predicted by using BPROM software [12] (*pilM*, RS07610). -35 and -10 elements are depicted as yellow boxes. 15bp motif and 8bp BfmR binding motifs are shown as wide and narrow blue rectangles, respectively. ORFs are shown as grey rectangles. Dotted vertical line indicates the location of the TSS.

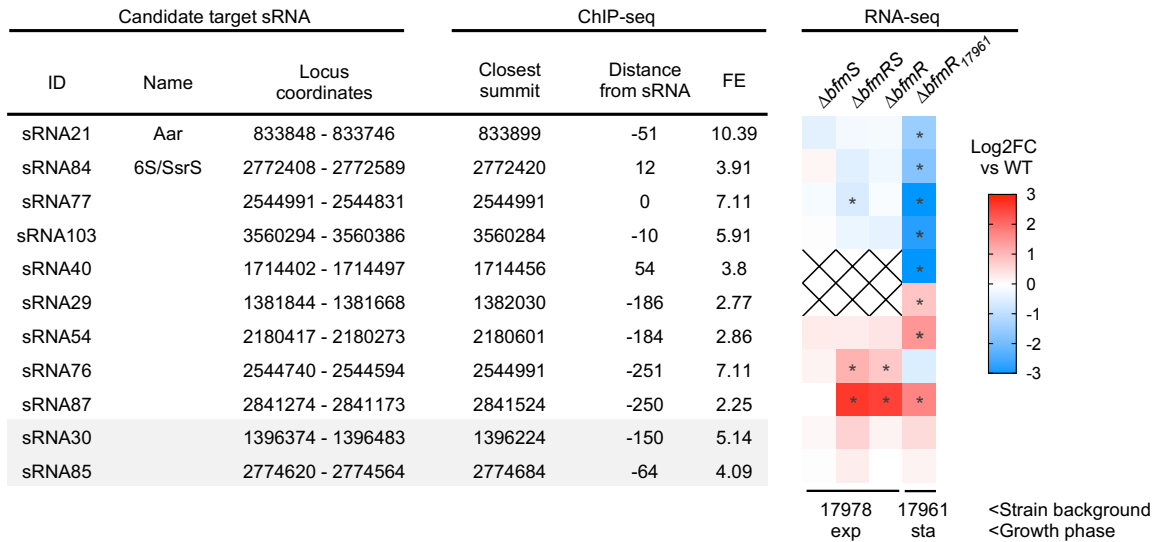

**Fig S5: Analysis of sRNAs that are candidates for direct regulation by BfmR.** sRNA loci were identified that are in proximity to a BfmR binding site identified by ChIP-seq. Locus coordinates indicate the position of the sRNA gene in 17978 (NZ\_CP012004). FE indicates ChIP-seq fold enrichment in NRA49 ( $\Delta bfmS$ ). Heatmap shows log<sub>2</sub> fold change in RNA-seq reads, comparing the indicated mutant to WT. X indicates raw read count was too low to analyze. \*, adjusted p-value <0.05; exp, exponential phase; sta, onset of stationary phase. Gray shading indicates candidates not showing significant BfmRS-dependent change in gene expression in RNAseq.

**Table S1. Strains, plasmids, and primers used in this study****Strains**

| Designation                                     | Genotype or description                                                                                   | Strain ID | Reference |
|-------------------------------------------------|-----------------------------------------------------------------------------------------------------------|-----------|-----------|
| <b><i>A. baumannii</i></b>                      |                                                                                                           |           |           |
| 17978                                           | cerebrospinal fluid isolate, AbaAL44 <sup>+</sup> (“UN”) type, ATCC                                       | EGA83     | [1, 2]    |
| 17978 $\Delta bfmS$                             | ATCC 17978 $\Delta bfmS::aacC1$                                                                           | EGA195    | [3]       |
| 17978 $\Delta bfmRS$                            | ATCC 17978 $\Delta bfmRS::aacC1$                                                                          | EGA495    | [4]       |
| 17978 $\Delta bfmR$                             | 17978 $\Delta bfmR::aacC1$                                                                                | EGA496    | [4]       |
| 17978 <i>bfmR</i> (D58A)                        | 17978 <i>bfmR</i> (D58A)                                                                                  | NRA407    | This work |
| 17978 <i>bfmR</i> (D58A) $\Delta bfmS$          | 17978 <i>bfmR</i> (D58A) $\Delta bfmS$                                                                    | NRA446    | This work |
| 17978 <i>sntp</i> -GFP                          | EGA83 with pEGE315                                                                                        | NRA480    | This work |
| 17978 <i>bfmR</i> (D58A) <i>sntp</i> -GFP       | NRA407 with pEGE315                                                                                       | NRA481    | This work |
| 17978 $\Delta bfmRS$ <i>sntp</i> -GFP           | EGA495 with pEGE315                                                                                       | NRA482    | This work |
| 17978 <i>pilMp</i> -GFP                         | EGA83 with pNRE216                                                                                        | NRA433    | This work |
| 17978 $\Delta bfmS$ <i>pilMp</i> -GFP           | EGA195 with pNRE216                                                                                       | NRA435    | This work |
| 17978 <i>bfmR</i> (D58A) <i>pilMp</i> -GFP      | NRA407 with pNRE216                                                                                       | NRA437    | This work |
| 17978 $\Delta bfmR$ P(IPTG)- <i>bfmR</i>        | EGA496 with pJE86                                                                                         | NRA460    | This work |
| 17978 $\Delta bfmR$ P(IPTG)- <i>bfmR</i> (D58A) | EGA496 with pNRE138                                                                                       | NRA461    | This work |
| 17978 $\Delta bfmR$ vector                      | EGA496 with pEGE305                                                                                       | NRA462    | This work |
| 17978 P(IPTG)- <i>bfmR</i>                      | EGA83 with pJE86                                                                                          | NRA147    | This work |
| 17978 P(IPTG)- <i>bfmR</i> (D58A)               | EGA83 with pNRE138                                                                                        | NRA456    | This work |
| 17978 vector                                    | EGA83 with pEGE305                                                                                        | NRA365    | This work |
| 17978 <i>bfmR</i> -3xFLAG                       | 17978 <i>bfmR</i> -3xFLAG                                                                                 | NRA28     | This work |
| 17978 <i>bfmR</i> (D58A)-3xFLAG                 | 17978 <i>bfmR</i> (D58A)-3xFLAG                                                                           | NRA29     | This work |
| 17978 <i>bfmR</i> -3xFLAG $\Delta bfmS$         | 17978 <i>bfmR</i> -3xFLAG $\Delta bfmS$                                                                   | NRA49     | This work |
| 17978 $\Delta gr6$                              | 17978 $\Delta gr6$                                                                                        | JBA202    | [5]       |
| 17978 $\Delta gr6$ <i>bfmR</i> (D58A)           | 17978 $\Delta gr6$ <i>bfmR</i> (D58A)                                                                     | NRA486    | This work |
| <b><i>E. coli</i></b>                           |                                                                                                           |           |           |
| DH5 $\alpha$                                    | <i>supE44</i> $\Delta lacU169$ ( $\phi$ 80 <i>lacZ</i> AM15) <i>hsdR17 recA1 endA1 gyrA96 thi-1 relA1</i> | EGE1      | [6]       |
| DH5 $\lambda$ pir                               | DH5 $\alpha$ ( $\lambda$ pir) <i>tet::Mu recA</i>                                                         | EGE4      | [7]       |
| BL21 (DE3) pLysS                                | F- <i>ompT hsdSB</i> (rB- mB-) <i>gal dcm</i> (DE3) pLysS (Cm <sup>r</sup> )                              | NRE81     | Novagen   |

**Plasmids**

| Plasmid | Description                                                                                          | Reference |
|---------|------------------------------------------------------------------------------------------------------|-----------|
| pUC18   | <i>oriColE1</i> MCS Cb <sup>r</sup>                                                                  | [8]       |
| pEGE305 | P(IPTG) shuttle vector ( <i>ori-pBR322 ori-pWH1277 bla::lacI<sup>r</sup>-T5lacP Tc<sup>r</sup></i> ) | [4]       |
| pJB4648 | Conditionally replicating allele exchange plasmid ( <i>oriTRP4 oriR6K sacB Gm<sup>r</sup></i> )      | [9]       |
| pNRE157 | pUC18 containing homology arms for introducing <i>bfmR</i> (D58A) allele                             | This work |
| pNRE169 | pJB4648 containing homology arms for introducing <i>bfmR</i> (D58A) allele                           | This work |
| pEGE245 | reporter plasmid with promoterless <i>gfpmut3</i> ( <i>ori-pBR322 ori-pWH1277, Tc<sup>r</sup></i> )  | [4]       |
| pEGE315 | <i>sntp</i> -GFP reporter plasmid ( <i>ori-pBR322 ori-pWH1277, Tc<sup>r</sup></i> )                  | [4]       |
| pNRE211 | pUC18:: <i>pilMp</i>                                                                                 | This work |
| pNRE216 | pEGE245:: <i>pilMp</i> -GFP                                                                          | This work |

**Table S1 (continued)**

|         |                                                                                                |           |
|---------|------------------------------------------------------------------------------------------------|-----------|
| pJE83   | pUC18:: <i>bfmR</i>                                                                            | This work |
| pJE86   | pEGE305:: <i>bfmR</i>                                                                          | This work |
| pNRE137 | pUC18:: <i>bfmR</i> (D58A)                                                                     | This work |
| pNRE138 | pEGE305:: <i>bfmR</i> (D58A)                                                                   | This work |
| pNRE80  | pUC18:: <u>[NdeI]</u> <i>bfmR</i> [BamHI]                                                      | This work |
| pNRE85  | pET28a:: <i>bfmR</i>                                                                           | This work |
| pNRE127 | pET28a:: <i>bfmR</i> (D58A)                                                                    | This work |
| pEGE228 | pUC18 containing <i>bfmR</i> -3xFLAG- <i>bfmS</i> allelic exchange construct                   | This work |
| pNRE26  | pJB4648 containing <i>bfmR</i> -3xFLAG- <i>bfmS</i> allelic exchange construct                 | This work |
| pNRE12  | pUC18 containing <i>bfmR</i> (D58A)-3xFLAG- <i>bfmS</i> allelic exchange construct             | This work |
| pNRE27  | pJB4648 containing <i>bfmR</i> (D58A)-3xFLAG- <i>bfmS</i> allelic exchange construct           | This work |
| pNRE31  | pUC18 containing upstream homology arm for <i>bfmS</i> deletion with <i>bfmR</i> -3xFLAG       | This work |
| pNRE32  | pUC18 containing upstream homology arm for <i>bfmS</i> deletion with <i>bfmR</i> (D58A)-3xFLAG | This work |
| pNRE33  | pUC18 containing downstream homology arm for <i>bfmS</i> deletion                              | This work |
| pNRE34  | pJB4648 containing homology arms for $\Delta$ <i>bfmS</i> deletion with <i>bfmR</i> -3xFLAG    | This work |

**Oligonucleotide primers**

| Primer name                            | Sequence (5' – 3'; restriction site underlined if present) | RE site(s) |
|----------------------------------------|------------------------------------------------------------|------------|
| <b>Allelic exchange</b>                |                                                            |            |
| <i>bfmR</i> -D58x-R                    | AGACCACAAGATCCGGTTGCTC                                     |            |
| <i>bfmR</i> -D58A-F                    | TGGCTGTCATGTTGCCGGGTGC                                     |            |
| <i>dbfmS</i> -down-F                   | CAT <u>GTCGAC</u> GCAATTGCCCATGATGAACT                     | Sall       |
| <i>dbfmS</i> -down-R                   | CAT <u>GGTACCT</u> TTAAACAACCGCCATTAAAGACC                 | KpnI       |
| <i>dbfmS</i> -up-F                     | TATGGTACCACTGTGTTAAACACTCGACCAACC                          | KpnI       |
| <i>dbfmS</i> -up-R                     | ATCGGATCCAGTTTGGTGAACGCCTACTTGT                            | BamHI      |
| BamHI-500up-BfmRD58A-F                 | ACATGGATCCCGGTAGATCAATCTTGACTTT                            | BamHI      |
| Sall-500dwn-BfmRD58A-R                 | ATGT <u>GTCGAC</u> GATTTTACAATCCATTGGTTTCTTTAAC            | Sall       |
| <b>Reporter/<i>bfmR</i> expression</b> |                                                            |            |
| SacI-pilMp-Fwd                         | ATGTGAGCTCGATCAAAAAAATTGGACGCACG                           | SacI       |
| KpnI-pilMp-Rev                         | TAGCGGTACCACTATTGTCCTATTATTTTTTATCCCC                      | KpnI       |
| <i>bfmRS</i> -ecoF                     | GTGGAATTCGCAAATGATAAACGAATGTATCTGCAAG                      | EcoRI      |
| <i>bfmR</i> only-pstR                  | TTACTGCAGCGACCAACCTTATAGGAAGTTTAATCAG                      | PstI       |
| NdeI-BfmR-Fwd                          | ACTGCCATATGAGCCAAGAAGAAAAG                                 | NdeI       |
| BamHI-BfmR-Rev                         | CAGTGGATCCTTACAATCCATTGGTTTCTTTAAC                         | BamHI      |
| <b>ChIP-qPCR</b>                       |                                                            |            |
| <i>dnaA</i> -qF1                       | GTAGATTCTCGTCCTGGTAGTATTT                                  |            |
| <i>dnaA</i> -qR1                       | CCTTAGCAGGTTGAGGTATAGG                                     |            |
| <i>bfmR</i> qPCR FWD Set 2             | TCGTCGTCTTCAACGATCAGAA                                     |            |
| <i>bfmR</i> qPCR REV Set 2             | GCAAATGATAAACGAATGTATCTGCAAG                               |            |
| <i>surA</i> Set 1F                     | CTATGCCTATGCGCCATACAA                                      |            |
| <i>surA</i> Set 1R                     | CATGACCATAGAAGCGGTAAGG                                     |            |
| 01845 Set 2F                           | GTTGTTCATGTGATACATGCCTAT                                   |            |

**Table S1 (continued)**

|                      |                                                                                    |  |
|----------------------|------------------------------------------------------------------------------------|--|
| 01845 Set 2R         | AGCAATTATTATGCCGTTTCCTC                                                            |  |
| itrA Set 1F          | GACCGTACCAGAAACAGCAT                                                               |  |
| itrA Set 1R          | TCGCCGCAAAGGTTTACA                                                                 |  |
| 18040 Set 1F         | CATCTTCGCGCTGCCTATAA                                                               |  |
| 18040 Set 1R         | ATTGCAGAATTTGTACCGCTATTAC                                                          |  |
| wzi Set 1F           | ACAGCCGATGAAGCAGTT                                                                 |  |
| wzi Set 1R           | ACTTTGAGAATTGTGCTGACAT                                                             |  |
| omp25 Set 1F         | AGCACATGGTTACAGTCCAG                                                               |  |
| omp25 Set 1R         | TGTTACAACCTTTCAGTCTAGAGCA                                                          |  |
| ompA Set 2F          | TCAAGCACTTGGAAGTCTATCA                                                             |  |
| ompA Set 2R          | TTGTTGTTCAAGCTCAGCCTA                                                              |  |
| pilM/pbp1a Set 1F    | GGACAATAGTGTGCTCAGTTAT                                                             |  |
| pilM/pbp1a Set 1R    | CTTGACAGAGAGCTCTAACAACCTTA                                                         |  |
| gidA Set 1F          | TGGCTTACCGTAAATCATGTCA                                                             |  |
| gidA Set 1R          | CGCCACCGATAACGATAACA                                                               |  |
| putP Set 2F          | GCGACCTGGATTAGGTTACAA                                                              |  |
| putP Set 2R          | TGTAGCACGGTAGGCAAATAA                                                              |  |
| efp Set 2F           | AACCGGGTAAAGGCCAAG                                                                 |  |
| efp Set 2R           | CGCCATCGTTGTATAGGTAGTT                                                             |  |
| aar-ChIP qPCR-1F     | GGTGATCACTGCGTAGAACAA                                                              |  |
| aar-ChIP qPCR-1R     | GCGTCACTAATAAACTTGAGTAGGT                                                          |  |
| RS07610-ChIP qPCR-2F | CGCTTGGCTAATGTTGTTAGTC                                                             |  |
| RS07610-ChIP qPCR-2R | GCTCATTATCTAAATCGACACTTACTC                                                        |  |
| sRNA77-ChIP qPCR-4F  | GTGGATCGAGGAGATATTACGATTAC                                                         |  |
| sRNA77-ChIP qPCR-4R  | ACCCAAATGGCGTCGAAA                                                                 |  |
| <b>RT-qPCR</b>       |                                                                                    |  |
| rpoC-qF4             | CAAACGGTGAGCCAATCATC                                                               |  |
| rpoC-qR4             | GCCTTCACCTTTCGCATTT                                                                |  |
| pilM-qPCR 2F         | GCTCTCTGTCAAGAACGGTAAA                                                             |  |
| pilM-qPCR 2R         | CTGCAACTGCTTCTGGATTTAAG                                                            |  |
| slt70-qF1            | CACTAGGCCGTTTTAGCAAATAAT                                                           |  |
| slt70-qR1            | GGCTACGGTTCGATAGAGATAC                                                             |  |
| aar qPCR FWD Set 1   | TGATATGAACCTCACGACATTTCT                                                           |  |
| aar qPCR REV Set 1   | GGTGATCACTGCGTAGAACAA                                                              |  |
| sRNA77-qPCR-1F       | ATTTGCTCTTTGCTAGCTGTTT                                                             |  |
| sRNA77-qPCR-1R       | GGTAATCGTAATATCTCCTCGATCC                                                          |  |
| <b>MST</b>           |                                                                                    |  |
| omp25-FB-FAM         | /56-<br>FAM/ATATATTAATAATTAATATAGTTACATAAAAAGCACATGGTTACA<br>GTCCAGTTACTTGGACAAGAT |  |
| omp25-RB             | ATCTTGTCCAAGTAACTGGACTGTAACCATGTGCTTTTTATGTAAC<br>ATATTTAATTTAATATAT               |  |
| adc-FAM-F            | /56-<br>FAM/TATTTAAAAAGAAAGATGCCTACTTTTATAACAAAAATCACCTA<br>ATTTAATTGTTATGTTTTATA  |  |
| adc-R                | TATAAACATAACAATTAATTAAGGTGATTTTTGTTATAAAAAGTAGGC<br>ATCTTTCTTTTAAATA               |  |



## Supplemental References

1. Bouvet, P. and P. Grimont, *Taxonomy of the Genus Acinetobacter with the Recognition of Acinetobacter baumannii sp. nov. Acinetobacter haemolyticus sp. nov. Acinetobacter johnsonii sp. nov. and Acinetobacter junii sp. nov. and Emended Descriptions of Acinetobacter calcoaceticus and Acinetobacter lwofii*. International Journal of Systematic Bacteriology, 1986. **36**(2): p. 228-240.
2. Wijers, C.D.M., et al., *Identification of Two Variants of Acinetobacter baumannii Strain ATCC 17978 with Distinct Genotypes and Phenotypes*. Infect Immun, 2021. **89**(12): p. e0045421.
3. Geisinger, E. and R.R. Isberg, *Antibiotic modulation of capsular exopolysaccharide and virulence in Acinetobacter baumannii*. PLoS Pathog, 2015. **11**(2): p. e1004691.
4. Geisinger, E., et al., *A global regulatory system links virulence and antibiotic resistance to envelope homeostasis in Acinetobacter baumannii*. PLoS Pathog, 2018. **14**(5): p. e1007030.
5. Bai, J., et al., *Genome-wide phage susceptibility analysis in Acinetobacter baumannii reveals capsule modulation strategies that determine phage infectivity*. PLoS Pathog, 2023. **19**(6): p. e1010928.
6. Hanahan, D., J. Jessee, and F.R. Bloom, *Plasmid transformation of Escherichia coli and other bacteria*. Methods Enzymol, 1991. **204**: p. 63-113.
7. Kolter, R., M. Inuzuka, and D.R. Helinski, *Trans-complementation-dependent replication of a low molecular weight origin fragment from plasmid R6K*. Cell, 1978. **15**(4): p. 1199-208.
8. Yanisch-Perron, C., J. Vieira, and J. Messing, *Improved M13 phage cloning vectors and host strains: nucleotide sequences of the M13mp18 and pUC19 vectors*. Gene, 1985. **33**(1): p. 103-19.
9. Andrews, H.L., J.P. Vogel, and R.R. Isberg, *Identification of linked Legionella pneumophila genes essential for intracellular growth and evasion of the endocytic pathway*. Infect Immun, 1998. **66**(3): p. 950-8.
10. Kroger, C., et al., *The primary transcriptome, small RNAs and regulation of antimicrobial resistance in Acinetobacter baumannii ATCC 17978*. Nucleic Acids Res, 2018. **46**(18): p. 9684-9698.
11. Prados, J., P. Linder, and P. Redder, *TSS-EMOTE, a refined protocol for a more complete and less biased global mapping of transcription start sites in bacterial pathogens*. BMC Genomics, 2016. **17**(1): p. 849.
12. Solovyev, V.V. and A.A. Salamov. *Automatic Annotation of Microbial Genomes and Metagenomic Sequences 3 MATERIAL AND METHODS Learning Parameters and Prediction of Protein-Coding Genes*. 2013.
